# Supplementary material for: PAK4 regulates stemness and progression in endocrine resistant ER-positive metastatic breast cancer
Source: bioRxiv or medRxiv preprint supplement (doi:10.1101/558528), 2019-02-26

# Supplementary info – Figure 1

**A**

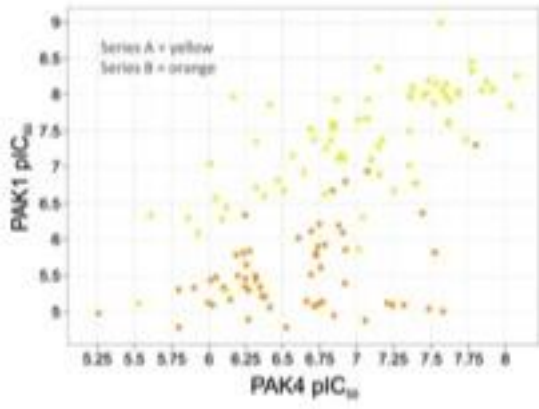

**B**

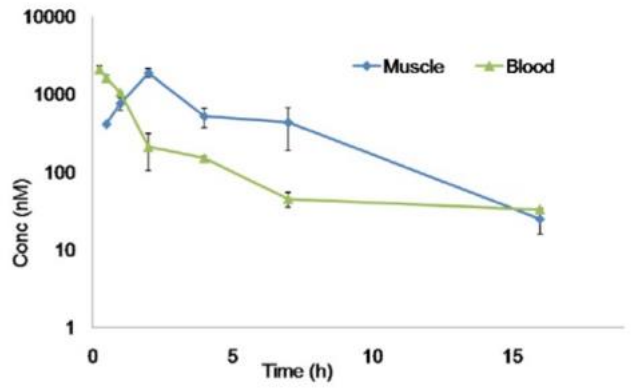

# Supplementary info – Figure 2

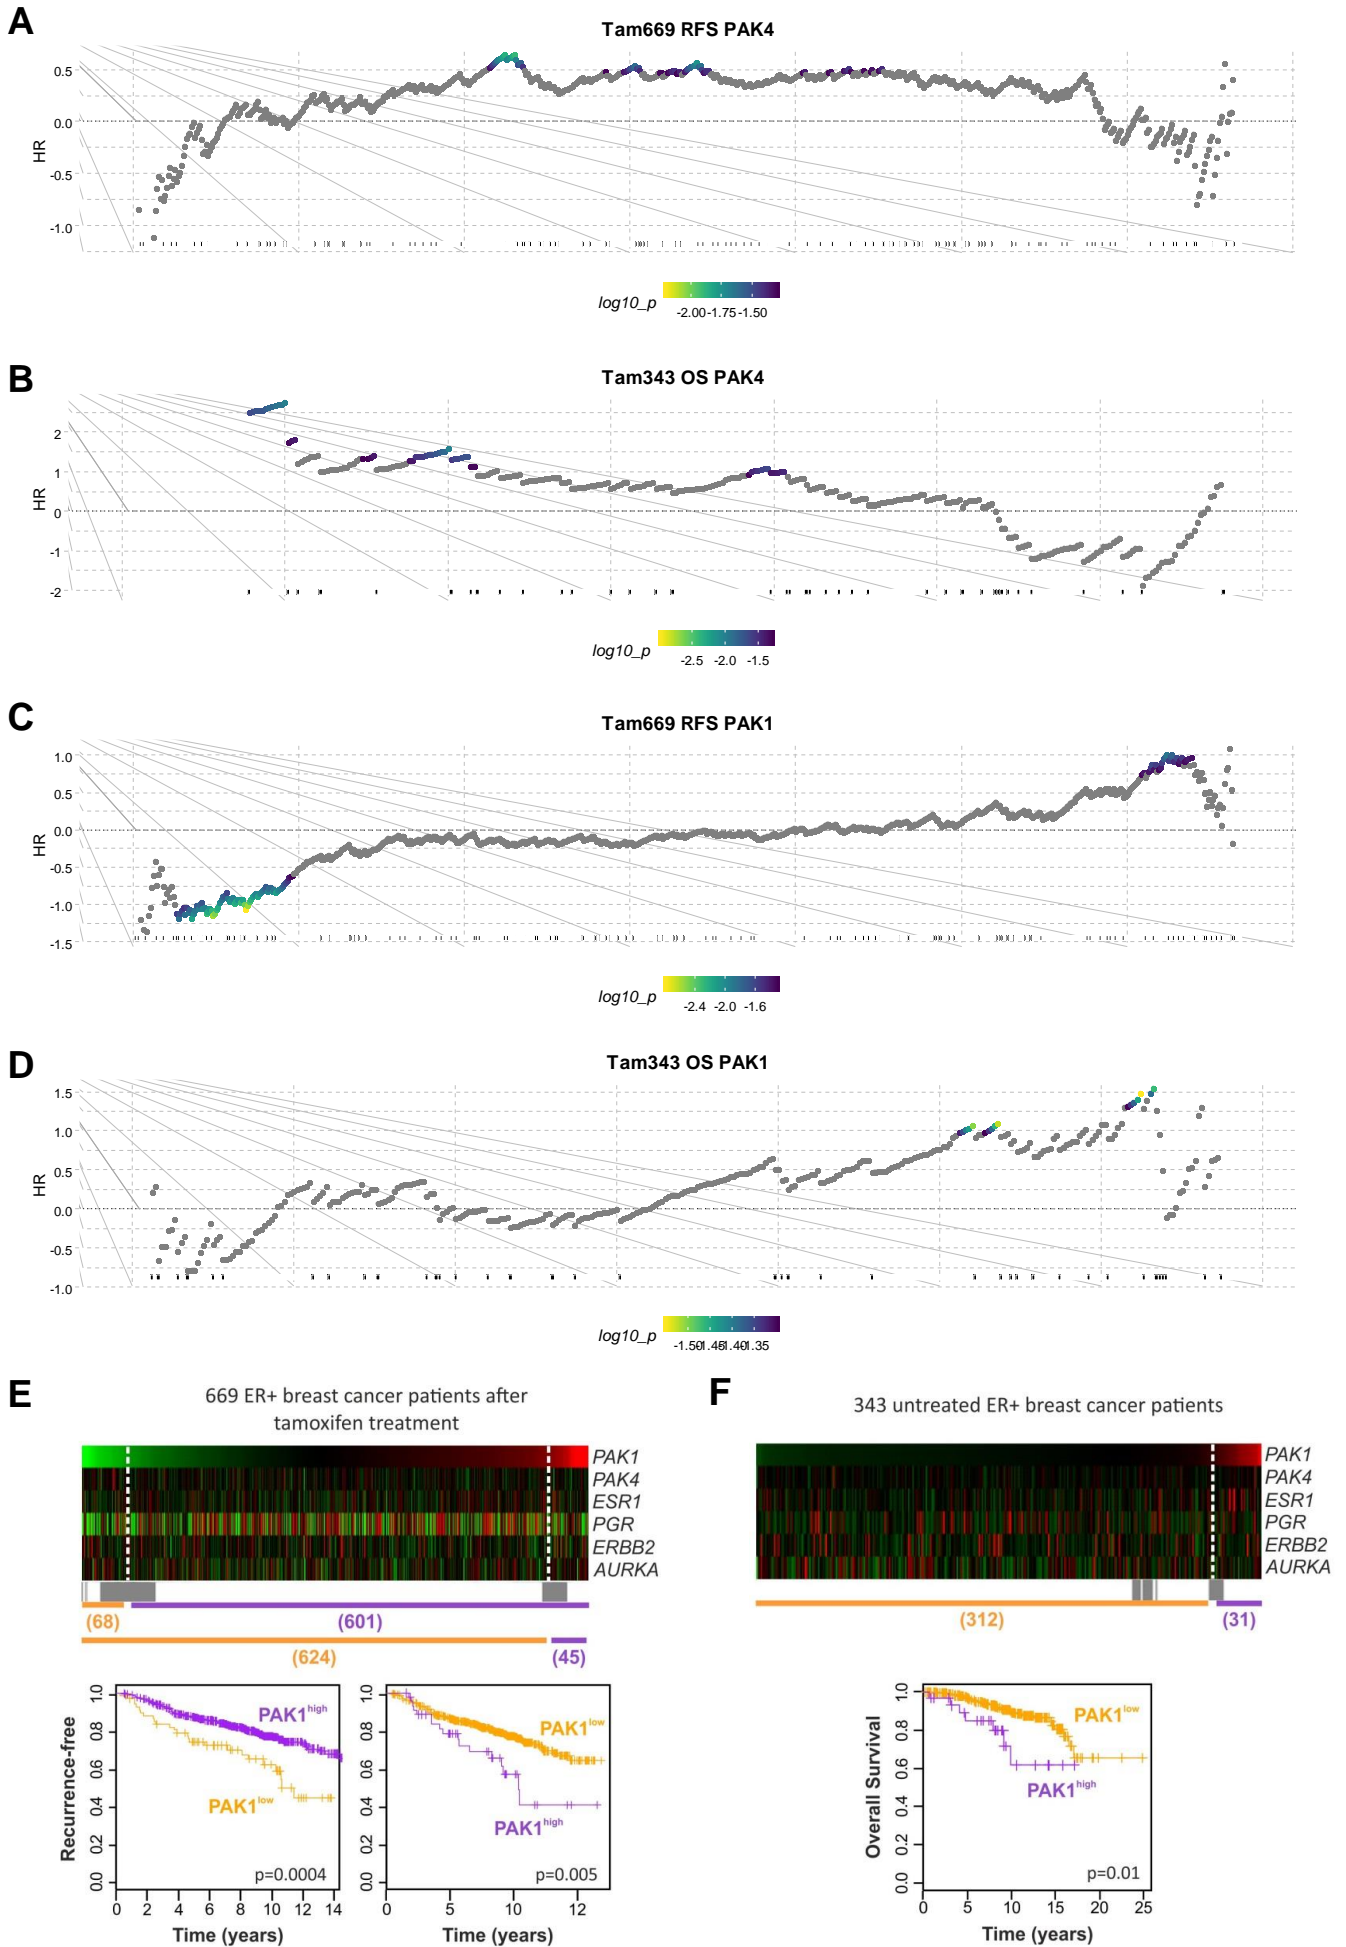

# Supplementary info – Figure 3

**A**

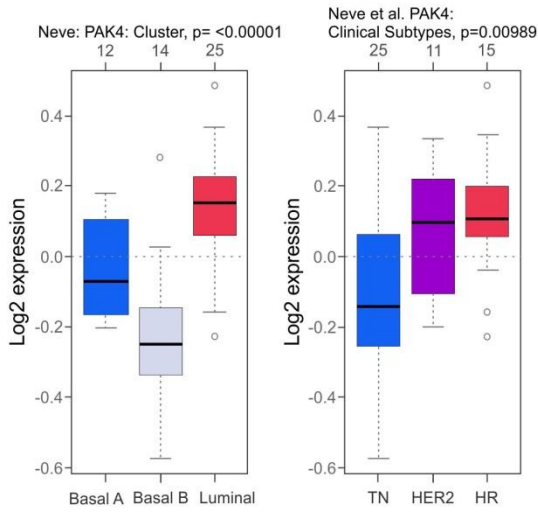

**B**

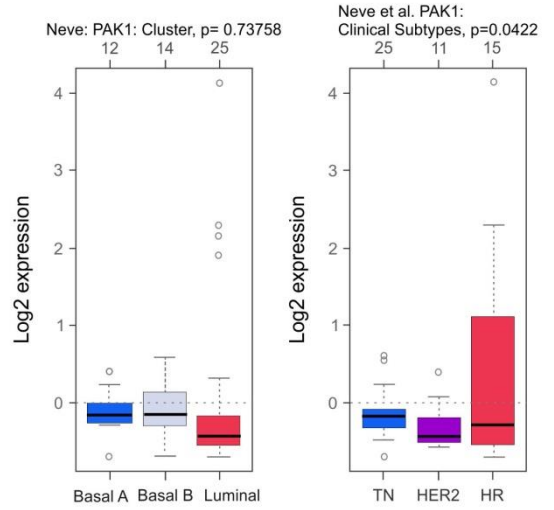

**C**

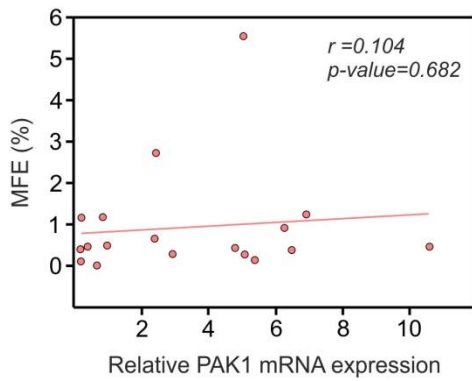

**D**

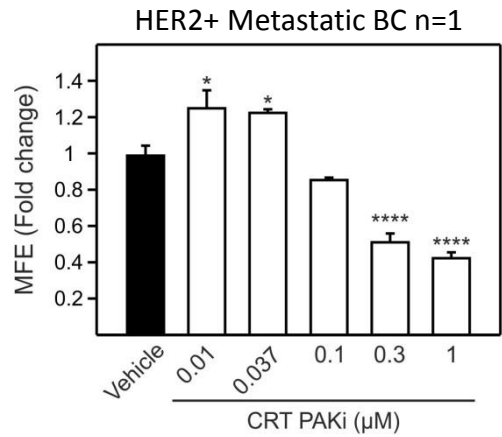

**E**

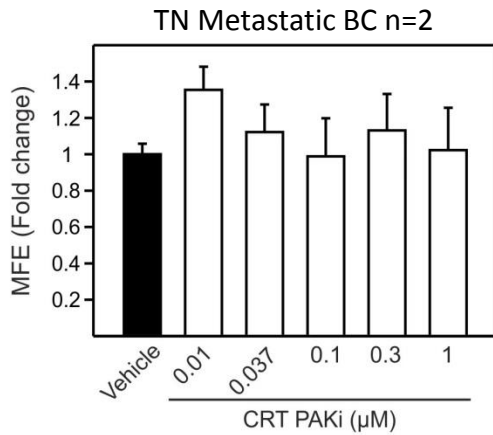

# Supplementary info – Figure 4

**A**

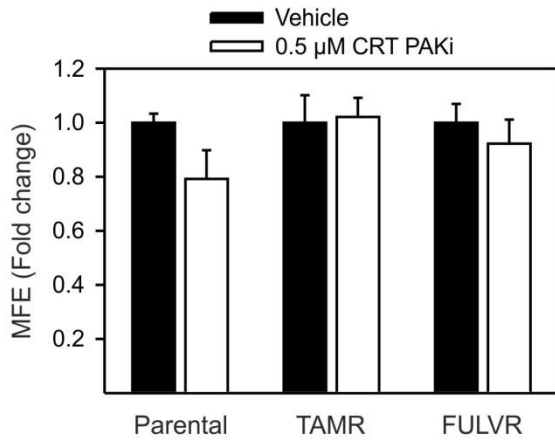

**B**

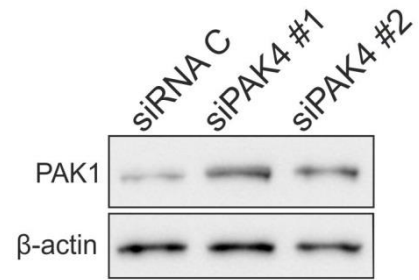

**C**

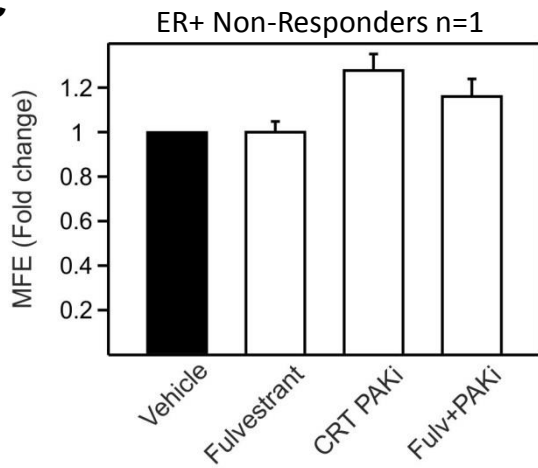

Supplement: Supplementary file [file media-2.pdf]
